# Supplementary material for: Phase IB Study of Sorafenib and Evofosfamide in Patients with Advanced Hepatocellular and Renal Cell Carcinomas (NCCTG N1135, Alliance)
Source: Research Square preprint supplement (doi:10.21203/rs.3.rs-234613/v1), 2021-02-24
Supplement: Supplementary file 1 [file 2721911ad7e3961b15eb38a0.docx]

| Table S1. Adverse Event (AE) | Dose-Limiting Toxicity Definition |
| --- | --- |
| Any AE | Any Grade 5 toxicity attributed to study treatment |
| Hematologic | Any Grade 4 neutropenia lasting more than 7 days |
|  | Febrile neutropenia |
|  | Grade 4 thrombocytopenia |
|  |  |
| Nervous system disorders | Any Grade ischemia cerobrovascular |
|  | Any Grade stroke |
|  | Any Grade transient ischemic attack |
|  |  |
| Other non-hematologic | Any non-hematological AEs grade 3 or greater lasting for 14 or more days |
|  | Any non-hematologic laboratory criteria which is Grade > 3 and lasting ≥ 14 days that is of clinical significance (e.g. elevated lipase only qualifies as DLT if it is in the presence of clinical pancreatits) |

| **Table S2. Demographics and Baseline Characteristics of Hepatocellular Carcinoma patients  (N =12)** | | | |  | |
| --- | --- | --- | --- | --- | --- |
|  | 0  [Sor 200/Evo 240] (N=4) | 1  [Sor 200/Evo 480] (N=2) | +1a  [Sor 200/Evo 340] (N=6) | | Total (N=12) | | p value |
| **Age (years)** |  |  |  | |  | | 0.35601 |
| N | 4 | 2 | 6 | | 12 | |  |
| Mean (SD) | 72.3 (7.4) | 63.0 (4.2) | 67.8 (10.4) | | 68.5 (8.8) | |  |
| Median | 73.0 | 63.0 | 64.0 | | 66.0 | |  |
| Range | (63.0-80.0) | (60.0-66.0) | (59.0-86.0) | | (59.0-86.0) | |  |
|  |  |  |  | |  | |  |
| **Gender** |  |  |  | |  | | 0.50002 |
| Female | 1 (25.0%) | 0 (0.0%) | 0 (0.0%) | | 1 (8.3%) | |  |
| Male | 3 (75.0%) | 2 (100.0%) | 6 (100.0%) | | 11 (91.7%) | |  |
|  |  |  |  | |  | |  |
| **Race** |  |  |  | |  | | 0.40912 |
| White | 2 (50.0%) | 2 (100.0%) | 6 (100.0%) | | 10 (83.3%) | |  |
| Black or African American | 1 (25.0%) | 0 (0.0%) | 0 (0.0%) | | 1 (8.3%) | |  |
| Native Hawaiian or Other  Pacific Islander | 1 (25.0%) | 0 (0.0%) | 0 (0.0%) | | 1 (8.3%) | |  |
|  |  |  |  | |  | |  |
| **ECOG PS** |  |  |  | |  | | 1.00002 |
| 0 | 0 (0.0%) | 0 (0.0%) | 1 (16.7%) | | 1 (8.3%) | |  |
| 1 | 4 (100.0%) | 2 (100.0%) | 5 (83.3%) | | 11 (91.7%) | |  |
|  |  |  |  | |  | |  |
| **Child Pugh Score** |  |  |  | |  | | 0.42851 |
| Mean (SD) | 6.5 (0.6) | 6.0 (1.4) | 5.8 (0.8) | | 6.1 (0.8) | |  |
| Median | 6.5 | 6.0 | 6.0 | | 6.0 | |  |
| Range | (6.0-7.0) | (5.0-7.0) | (5.0-7.0) | | (5.0-7.0) | |  |
|  |  |  |  | |  | |  |
| **Child Pugh Classification** |  |  |  | |  | | 0.41412 |
| A | 2 (50.0%) | 1 (50.0%) | 5 (83.3%) | | 8 (66.7%) | |  |
| B | 2 (50.0%) | 1 (50.0%) | 1 (16.7%) | | 4 (33.3%) | |  |
|  |  |  |  | |  | |  |
| **Bilirubin** |  |  |  | |  | | 0.72121 |
| Mean (SD) | 1.3 (0.9) | 0.8 (0.0) | 0.8 (0.5) | | 1.0 (0.6) | |  |
| Median | 1.0 | 0.8 | 0.8 | | 0.8 | |  |
| Range | (0.6-2.5) | (0.8-0.8) | (0.2-1.5) | | (0.2-2.5) | |  |
|  |  |  |  | |  | |  |
| **Albumin** |  |  |  | |  | | 0.88171 |
| Mean (SD) | 3.6 (0.4) | 3.3 (0.8) | 3.6 (0.2) | | 3.5 (0.4) | |  |
| Median | 3.7 | 3.3 | 3.6 | | 3.6 | |  |
| Range | (3.0-3.8) | (2.7-3.8) | (3.2-3.8) | | (2.7-3.8) | |  |
|  |  |  |  | |  | |  |
| **AFP** |  |  |  | |  | | 0.74032 |
| <= 400 ng/ml | 1 (25.0%) | 1 (50.0%) | 4 (66.7%) | | 6 (50.0%) | |  |
| > 400 ng/ml | 3 (75.0%) | 1 (50.0%) | 2 (33.3%) | | 6 (50.0%) | |  |
|  |  |  |  | |  | |  |
| **Disease Status** |  |  |  | |  | | 1.00002 |
| Intrahepatic | 2 (50.0%) | 1 (50.0%) | 2 (33.3%) | | 5 (41.7%) | |  |
| Extrahepatic | 2 (50.0%) | 1 (50.0%) | 4 (66.7%) | | 7 (58.3%) | |  |
|  |  |  |  | |  | |  |
| **Vascular Invasion** |  |  |  | |  | | 0.41922 |
| Yes | 3 (75.0%) | 0 (0.0%) | 2 (33.3%) | | 5 (41.7%) | |  |
| No | 1 (25.0%) | 2 (100.0%) | 4 (66.7%) | | 7 (58.3%) | |  |
|  |  |  |  | |  | |  |
| **History of Cirrhosis** |  |  |  | |  | | 1.00002 |
| Yes | 3 (75.0%) | 2 (100.0%) | 5 (83.3%) | | 10 (83.3%) | |  |
| No | 1 (25.0%) | 0 (0.0%) | 1 (16.7%) | | 2 (16.7%) | |  |
|  |  |  |  | |  | |  |
| **Hepatitis B** |  |  |  | |  | | 0.18792 |
| Yes | 1 (25.0%) | 2 (100.0%) | 1 (16.7%) | | 4 (33.3%) | |  |
| No | 3 (75.0%) | 0 (0.0%) | 5 (83.3%) | | 8 (66.7%) | |  |
|  |  |  |  | |  | |  |
| **Hepatitis C** |  |  |  | |  | | 0.13132 |
| Yes | 2 (50.0%) | 0 (0.0%) | 5 (83.3%) | | 7 (58.3%) | |  |
| No | 2 (50.0%) | 2 (100.0%) | 1 (16.7%) | | 5 (41.7%) | |  |
|  |  |  |  | |  | |  |
| **Alcohol Related** |  |  |  | |  | | 0.57582 |
| Yes | 1 (25.0%) | 0 (0.0%) | 3 (50.0%) | | 4 (33.3%) | |  |
| No | 3 (75.0%) | 2 (100.0%) | 3 (50.0%) | | 8 (66.7%) | |  |
|  |  |  |  | |  | |  |
| **NASH** |  |  |  | |  | |  |
| No | 4 (100.0%) | 2 (100.0%) | 6 (100.0%) | | 12 (100.0%) | |  |
|  |  |  |  | |  | |  |
| **Other Etiology** |  |  |  | |  | |  |
| No | 4 (100.0%) | 2 (100.0%) | 6 (100.0%) | | 12 (100.0%) | |  |
|  |  |  |  | |  | |  |
| **Prior Chemoembolization** |  |  |  | |  | | 0.34552 |
| Yes | 0 (0.0%) | 1 (50.0%) | 2 (33.3%) | | 3 (25.0%) | |  |
| No | 4 (100.0%) | 1 (50.0%) | 4 (66.7%) | | 9 (75.0%) | |  |
|  |  |  |  | |  | |  |
| **Previous Tumor Directed Therapy** |  |  |  | |  | | 0.26872 |
| Yes | 0 (0.0%) | 1 (50.0%) | 3 (50.0%) | | 4 (33.3%) | |  |
| No | 4 (100.0%) | 1 (50.0%) | 3 (50.0%) | | 8 (66.7%) | |  |
| 1Kruskal Wallis    2Fisher Exact  Sor, sorafenib; Evo, evofosfamide; ECOG PS, Eastern Cooperative Oncology Group Performance Status; AFP; alphafeto protein; NASH, Non-alcoholic steatohepatitis | | | | | | | |

| Table S3. Best Response by RECIST 1.1 | Dose Level 0  (N=6 Evaluable) | Dose Level 1 (N=5 evaluable) | Dose Level +1a (N=7 evaluable) |
| --- | --- | --- | --- |
| Best Response  PR  SD  PD  Not assessed | 1**  5  0  0 | 0  1  2  2* | 1  2  1  3* |
| Confirmed Response Rate | 0/6 (0%) | 0/5 (0%) | 1/7 (14%) – (PR) |

* Tumor was not assessed due to early discontinuation of trial.

**Unconfirmed

PR, partial response; SD, stable disease; PD, progressive disease

**Figure S1. Progresion-Free Survival All Patients***


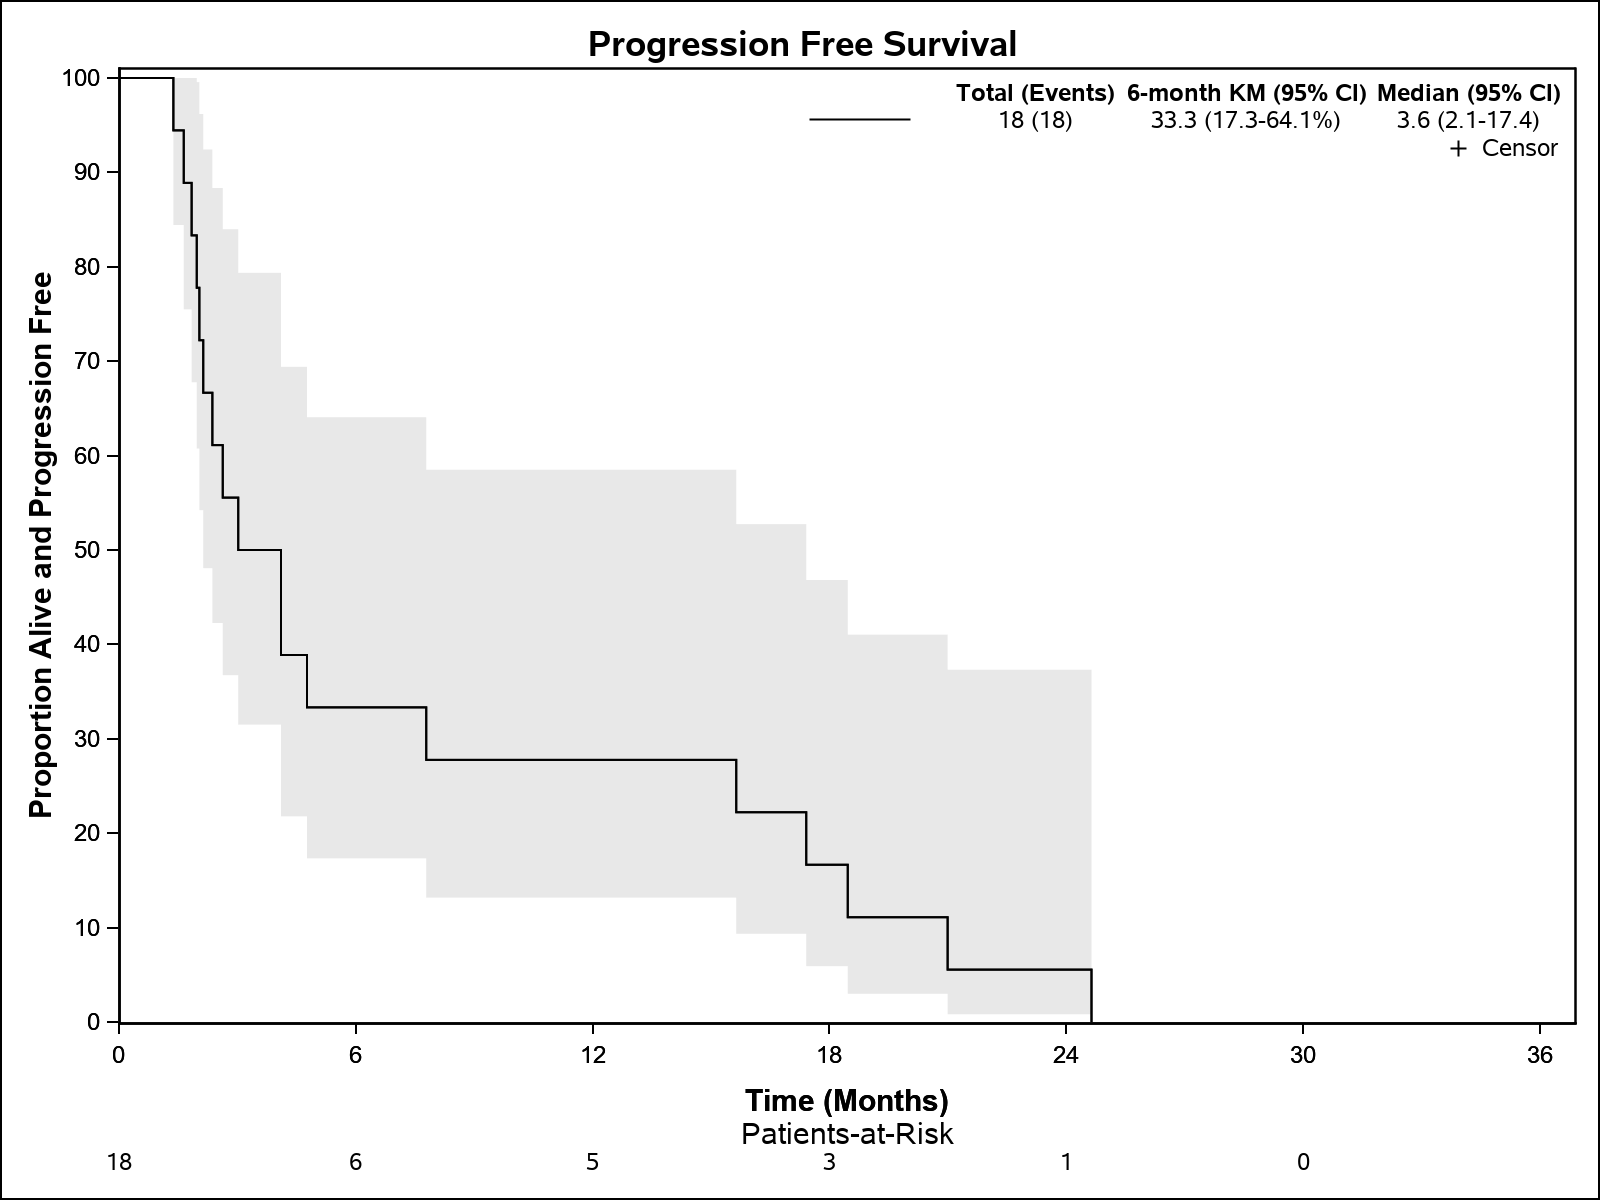


***Kaplan-Meier analysis was performed**

**Figure S2. Overall Survival All Patients***


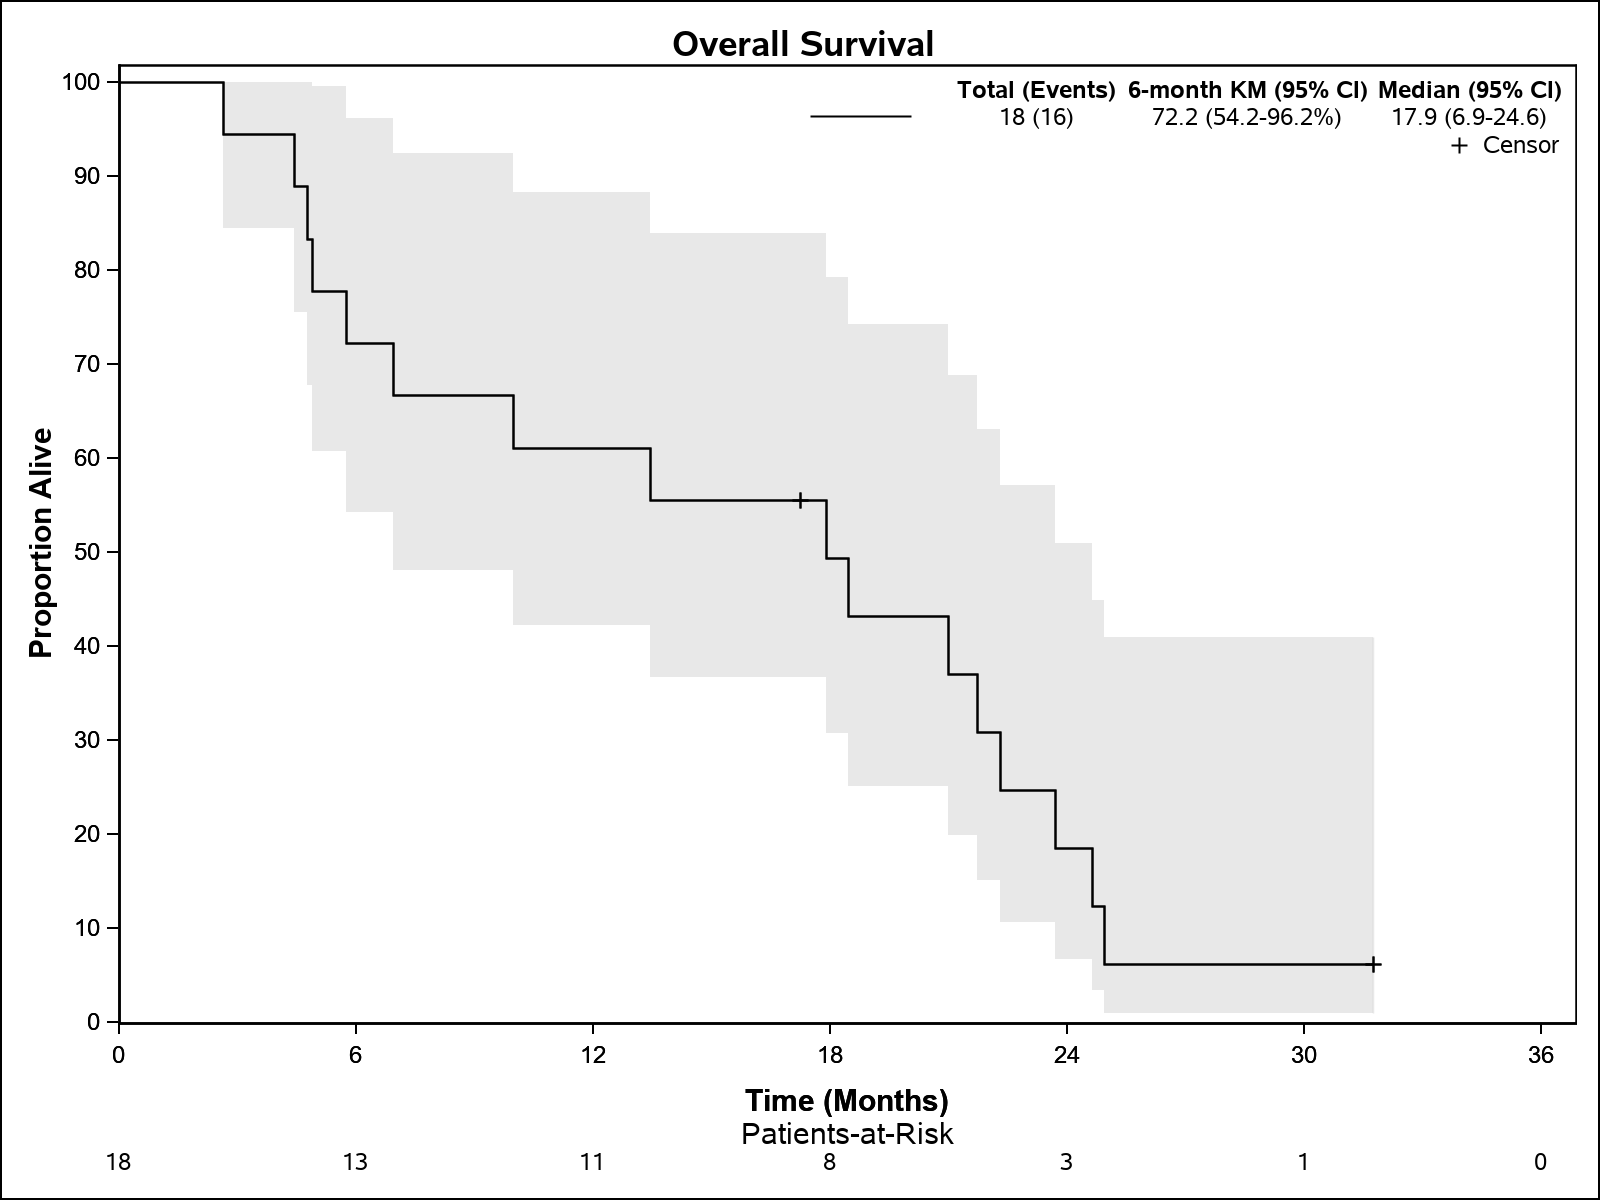


***Kaplan-Meier analysis was performed**

**Figure S3. Progression-Free Survival HCC patients***


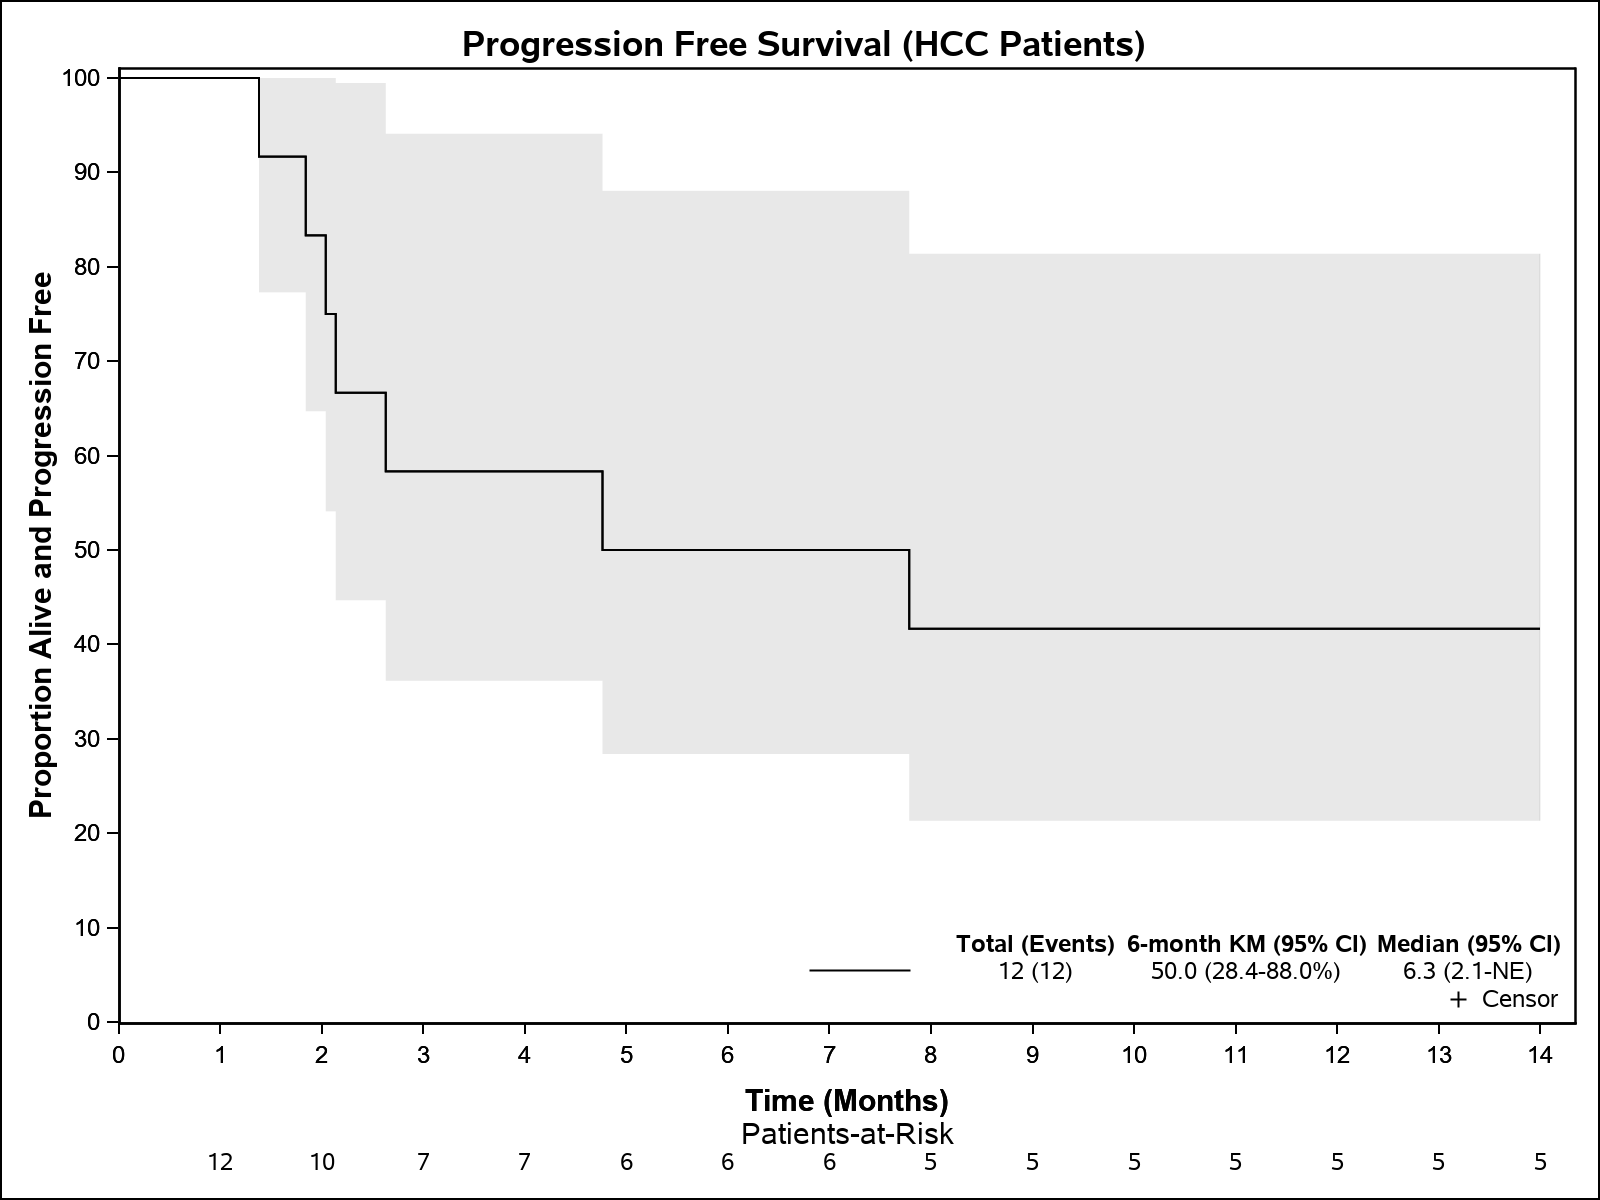


***Kaplan-Meier analysis was performed**

**Figure S4. Overall Survival HCC patients***


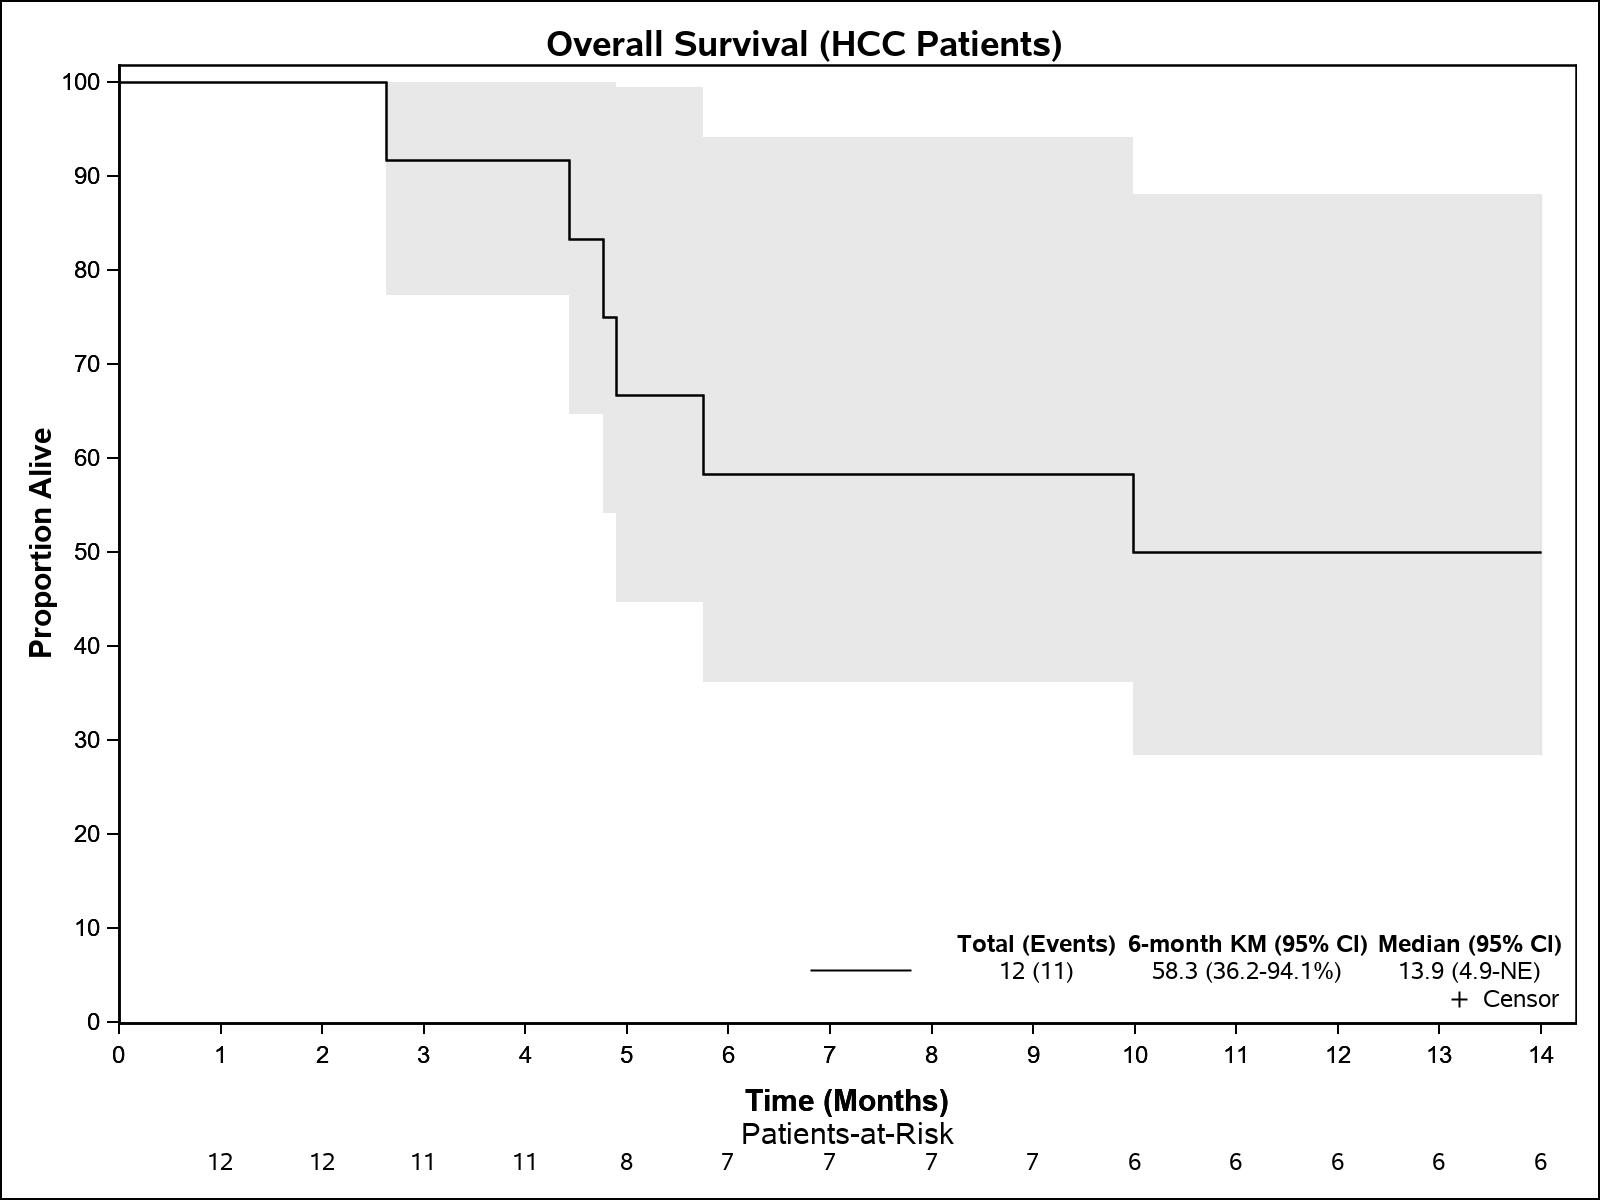


***Kaplan-Meier analysis was performed**
